# Supplementary material
Source: PubMed Central journal article supplement (PMC9343347)
Supplement: 41467_2022_32254_MOESM1_ESM.pdf [file 41467_2022_32254_MOESM1_ESM.pdf]

## Levels of SARS-CoV-2 antibodies among fully vaccinated individuals with Delta or Omicron variant breakthrough infections

### Supplementary note 1. Delta variant occurrence in Denmark.

Information regarding the development of Alpha and Delta SARS-CoV-2 variants in Denmark during the study period may be found using the following link <https://files.ssi.dk/covid19/virusvarianter/status/virusvarianter-covid19-04082021-m143> for the report "Status for udvikling af SARS-CoV-2 Varianter der overvåges i Danmark" ("Status of the development of SARS-CoV-2 variants under surveillance in Denmark") of the 4th of August 2021.

### Supplementary note 2. Omicron occurrence in Denmark.

Number of confirmed SARS-CoV-2 cases, Omicron cases, samples tested with variant PCR, percentage with variant PCR and percentage of Omicron cases during the study period may be found through the following link: <https://files.ssi.dk/covid19/omikron/statusrapport/rapport-omikronvarianten-07012022-27nk> Statens Serum Institut, "Rapport om Omikronvarianten" ("Report about the omicron variant") 7. January 2022.

### Supplementary table 1. Variant classification of breakthrough infections

|         | Variant sequence confirmed |            | Total |
|---------|----------------------------|------------|-------|
|         | Yes, N (%)                 | No, N (%)  | N     |
| Alpha   | 3 (75.0)                   | 1 (25.0)   | 4     |
| Delta   | 120 (94.5)                 | 7 (5.5)    | 127   |
| Omicron | 40 (11.0)                  | 324 (89.0) | 364   |
| Unknown | 0                          | 9 (100)    | 9     |
| Total   | 163 (32.3)                 | 341 (67.7) | 504   |

**Supplementary table 2. Reasons for exclusion.**

| <i>Total included</i> | <i>Reason for exclusion</i>                  |
|-----------------------|----------------------------------------------|
| 6950                  | All participants                             |
| 6927                  | Consent withdrawn and requested data deleted |
| 6926                  | Aged under 18                                |
| 6925                  | No vaccine data registered                   |
| 6918                  | Non-standard vaccine regimen                 |
| 6910                  | Only received 1 dose of vaccine              |
| 6525                  | Previously infected with SARS-CoV-2          |
| 6421                  | No-follow-up (withdrew before baseline)      |
| 6076                  | No follow-up antibody measurements           |

Supplementary figure 1. Time from baseline to breakthrough infection after initial vaccination by viral variant shown as Kaplan Meier plots. All infections analysis n=6076, Delta infections analysis n=6063, Omicron analysis n=5050

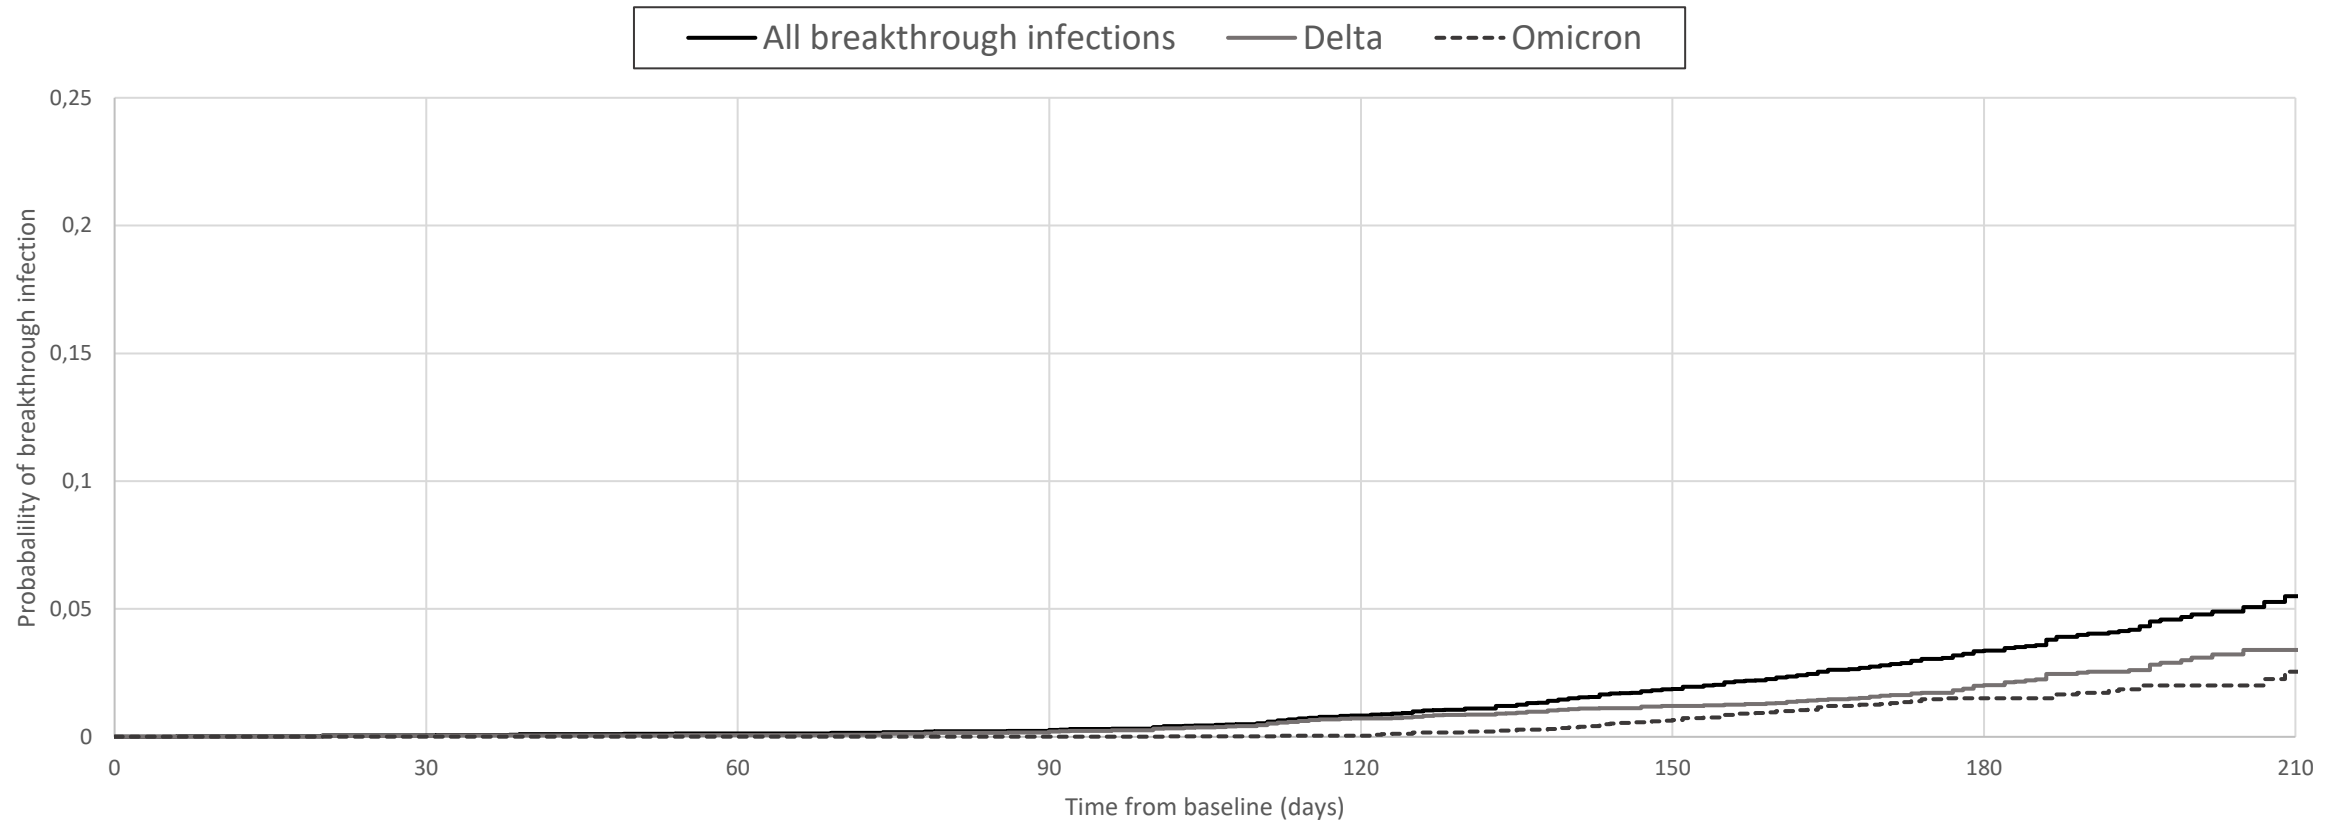

| Time    |         | 0    | 30   | 60   | 90   | 120  | 150  | 180  | 210 |
|---------|---------|------|------|------|------|------|------|------|-----|
| All     | Failed  | 0    | 3    | 8    | 16   | 50   | 110  | 171  | 204 |
|         | At risk | 6076 | 6071 | 6053 | 6036 | 5975 | 5135 | 2882 | 319 |
| Delta   | Failed  | 0    | 2    | 4    | 12   | 43   | 70   | 100  | 123 |
|         | At risk | 6063 | 6061 | 6049 | 6033 | 5861 | 5054 | 5811 | 302 |
| Omicron | Failed  | 0    | 0    | 0    | 0    | 2    | 31   | 60   | 70  |
|         | At risk | 5050 | 5050 | 5050 | 5046 | 5019 | 4257 | 2127 | 279 |

Supplementary figure 2. Time from baseline to breakthrough infections after booster vaccination shown as Kaplan Meier plots. All infections analysis (n=3939), Delta infections analysis (n=1511), Omicron analysis (n=3932)

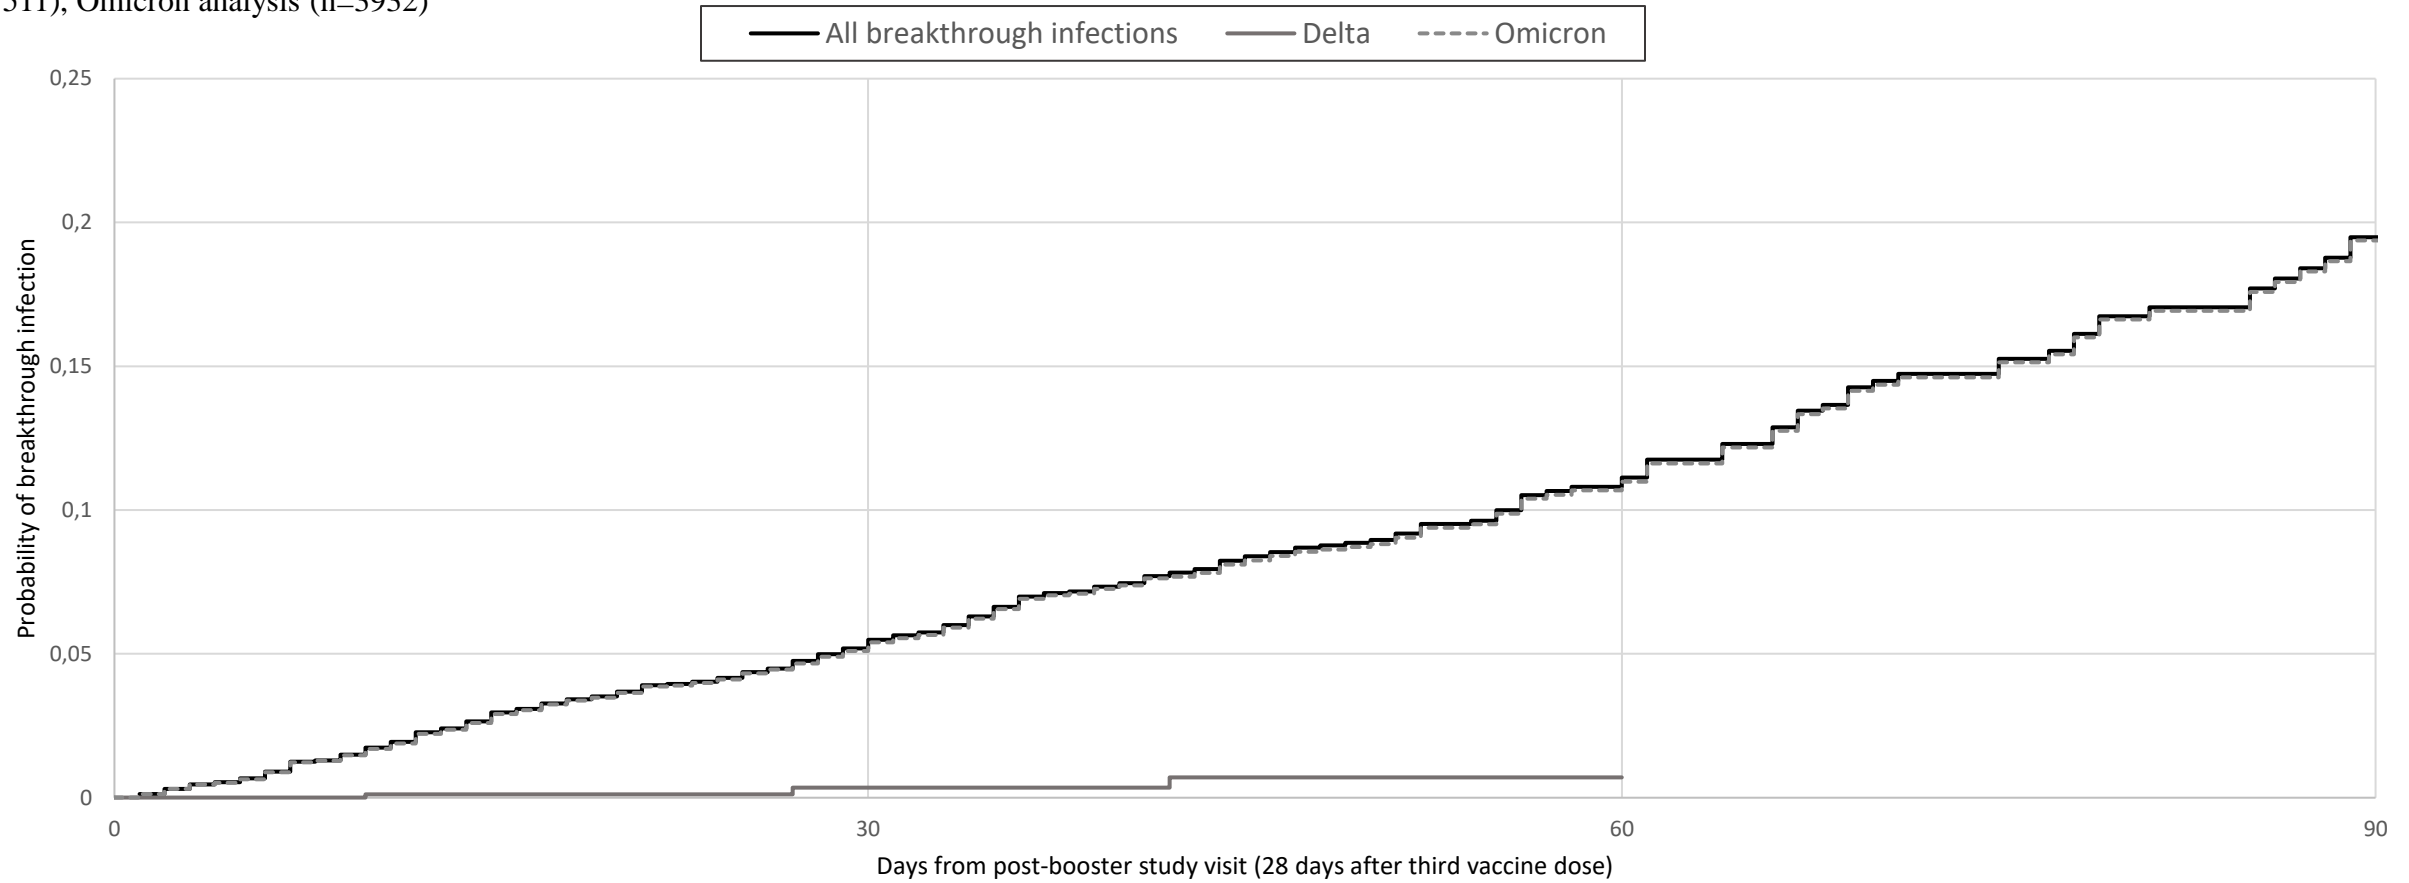

| Time    |         | 0    | 30   | 60  | 90  |
|---------|---------|------|------|-----|-----|
| All     | Failed  | 0    | 171  | 245 | 279 |
|         | At risk | 3939 | 1853 | 569 | 214 |
| Delta   | Failed  | 0    | 2    | 3   | -   |
|         | At risk | 1511 | 344  | 129 | -   |
| Omicron | Failed  | 0    | 168  | 241 | 275 |
|         | At risk | 3932 | 1850 | 568 | 214 |

**Supplementary figure 3: Incidence rate ratios (IRR) and adjusted incidence rate ratios (aIRR) for breakthrough infections.** Calculated using a Poisson regression analysis for each quintile of SARS-CoV-2 anti-receptor binding domain (RBD) IgG log<sub>10</sub> BAU, stratified by viral variant. Participants were censored at the time of third SARS-CoV-2 vaccination and re-entered the analysis at the time of post-booster visit.

The multivariable models were adjusted for age at enrolment (per year later), gender (male vs female), healthcare worker (no vs yes) and transmission level with two-sided chi-squared tests for each variable in the model. The multivariable model for the Omicron variant did not include transmission level as all Omicron breakthrough infections occurred during the very high transmission period. All variants analysis (n=6076), Delta analysis (n=6063), Omicron (n=5050). The data presented are the aIRR and 95% confidence intervals from the multivariable models.

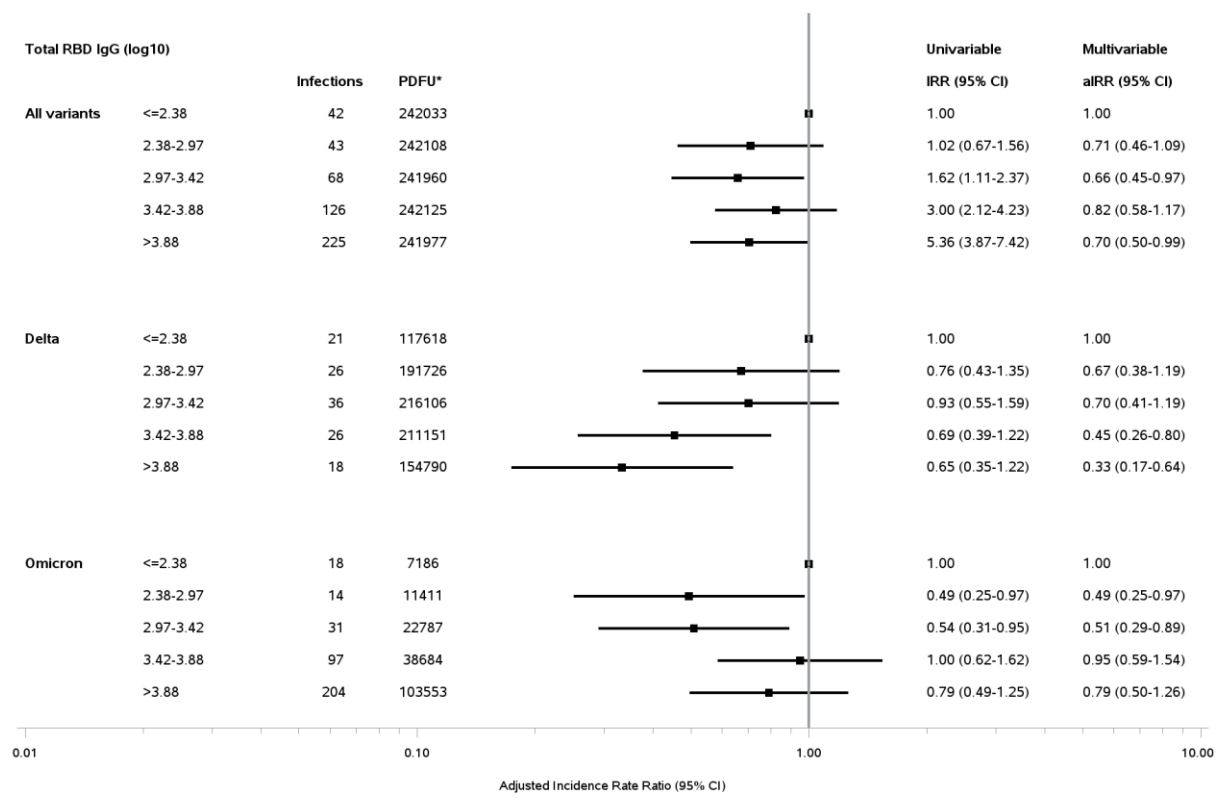

**Supplementary figure 4:**

Sensitivity analysis forest plot of the adjusted incidence rate ratios (aIRR) for breakthrough infections, using total anti-spike antibody levels in quintiles specific for each variant. Incidence rate ratios (IRR) and adjusted incidence rate ratios (aIRR) for breakthrough infections calculated using a Poisson regression analysis for each quintile of SARS-CoV-2 anti-spike IgG log10 BAU specific for each viral variant. Participants were censored at the time of third SARS-CoV-2 vaccination and re-entered the analysis at the time of post-booster visit. The multivariable models were adjusted for age at enrolment (per year later), gender (male vs female), healthcare worker (no vs yes) and transmission level with two-sided chi-squared tests for each variable in the model. The multivariable model for the Omicron variant did not include transmission level as all Omicron breakthrough infections occurred during the very high transmission period. Delta analysis (n=6063), Omicron (n=5050). The data presented are the aIRR and 95% confidence intervals from the multivariable models.

\*Person days of follow-up

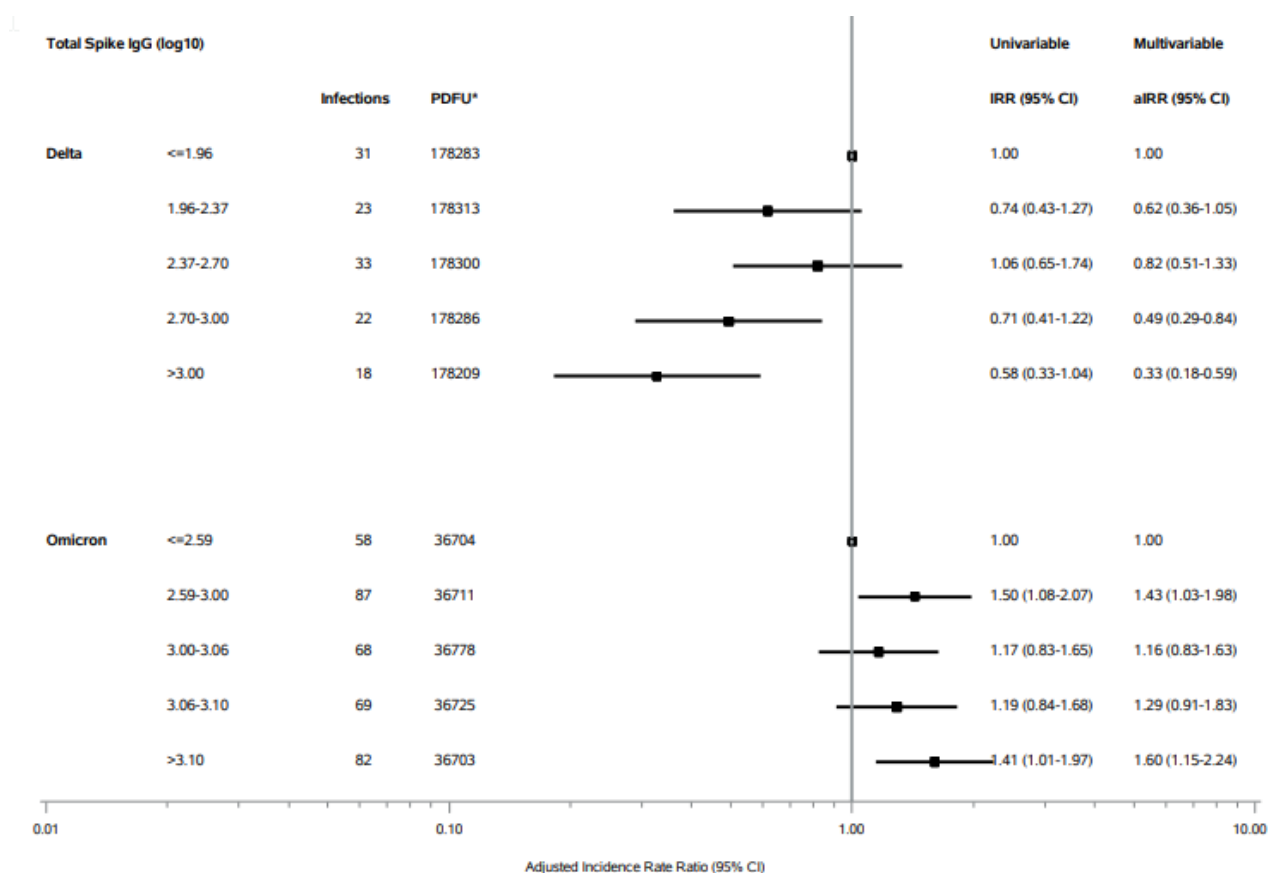

## The ENFORCE study group by affiliation.

### Coordinating center, Aarhus University/Aarhus University Hospital:

Lars Østergaard, professor  
Ole Søgaard, professor  
Martin Tolstrup, professor  
Katrine Lykkegaard  
Vibeke Klastrup, MD  
Fredrikke Larsen, MD

### Sponsor and Data center, Center of Excellence for Health, Immunity and Infections (CHIP):

Jens Lundgren, professor  
Dorthe Raben, MSc  
Anna Gro Eilersen  
Anna Traytel, MSc  
Charlotte Matthews, RN  
Christian Møller Jensen  
Dennis Kristensen BSc Eng  
Erik V. Hansen MSc Eng  
Esther Gravholt  
Frederik Esmann  
Joanne Reekie, PhD  
Marie Louise Jakobsen, RN  
Nick Normand  
Signe Wolsgård Krøyer  
Stine F. Jakobsen, MA  
Tomas Østergaard Jensen, MD

### The Capital Region of Denmark:

Thomas Benfield, professor  
Kasper Karmark Iversen, professor  
Charlotte Kastberg Levin, RN  
Dorthe Petersen, RN  
Kamille Fogh, MD  
Louise Krohn-Dehli, RN

### The Central Denmark Region:

Nina Breinholt Stærke, MD  
Ane Søndergaard, RN  
Malene Østergaard, RN  
Sandra Schieber, RN  
Helene Høgh Sørensen  
Amalie Glavind Duus  
Yordanos Yehdego, RN

The North Denmark Region:

Henrik Nielsen, professor  
Jacob Bodilsen, PhD  
Kristine Toft Petersen, RN  
Maria Ruwald Juhl, RN  
Rikke Krog Thisted, RN

The Region of Southern Denmark:

Isik Somuncu Johansen, professor  
Christiane Abildgaard  
Inge Kristine Holden, PhD  
Lone Wulff Madsen, MD  
Lykke Larsen, MD  
Susan Olaf Lindvig, RN

Region Zealand:

Lothar Wiese, PhD  
Janne Lykkegaard Meyerhoff, RN  
Lea Guldborg Sander, RN  
Lene Surland Knudsen, PhD  
Mette Iversen, MD  
Sidsel Fjordbak Caspersen, RN

Research Lab, Department of Infectious Diseases, Aarhus University Hospital:

Anna Karina Juhl, PhD  
Astrid Korning Hvidt, Cand.Scient.  
Eva Baerends, Cand.Scient.  
Lisa Loksø Dietz, Cand.Scient.  
Mariane Høgsbjerg Schleimann, PhD  
Rikke Olesen, PhD  
Sidsel Dahl Andersen, PhD  
Signe Rode Andreasen, PhD

Statens Serum Institut, serology lab and National Danish Biobank:

Charlotte Sværke Jørgensen, PhD  
Karina Meden Sørensen, PhD  
Bart Wilkowski, PhD  
Jacob Melbye



Scientific Steering Committee:

Bolette Søborg, PhD, Danish Health Authority  
Christian Erikstrup, professor, Aarhus University Hospital  
Hanne Lomholt Larsen, Danish Medicines Agency  
Nanna Aaby Kruse, Danish Medicines Agency  
Palle Valentiner-Branth, PhD, Statens Serum Institut  
Sisse Ostrowski, professor, Rigshospitalet  
Thea Kølsen Fischer, professor, University of Copenhagen  
Tyra Grove Krause, PhD, Statens Serum Institut

Other contributors:

David Hougaard, D.Sc, Statens Serum Institut  
Erik Jylling, director, Danske Regioner  
Anne-Mette Hvass, Professor, Aarhus University Hospital
